# Supplementary material for: Theoretical insights into the separation of Am(iii) over Eu(iii) with PhenBHPPA
Source: Royal Society of Chemistry journal article supplement (doi:10.1039/c5dt02528a), 2015-01-01
Supplement: c5dt02528a1.pdf [file c5dt02528a1.pdf]

## Electronic Supplementary Information

to the paper “Theoretical Insights into the Separation of Am(III) over Eu(III) with PhenBHPPA” by Han Wu, Qun-Yan Wu, Cong-Zhi Wang, Jian-Hui Lan, Zhi-Rong Liu, Zhi-Fang Chai and Wei-Qun Shi

### Contents:

**Table S1** The average  $\rho$  and  $\nabla^2\rho$  values of the M-N<sub>L</sub> and M-O<sub>L</sub> BCPs in the Eu and Am complexes with PhenBHPPA.

**Table S2** Contribution (%) of metal atom and the nitrogen (N<sub>L</sub>) and oxygen atoms of ligand (O<sub>L</sub>), and the oxygen atoms of nitrate anion (O<sub>N</sub>) to the delocalized canonical MOs for complexes [EuL(NO<sub>3</sub>)<sub>2</sub>]<sup>+</sup> and [AmL(NO<sub>3</sub>)<sub>2</sub>]<sup>+</sup>.

**Table S3** Changes of Gibbs free energies (kcal/mol) for complexation reactions of Am<sup>3+</sup> and Eu<sup>3+</sup> complexes with PhenBHPPA ligand in the gas phase, aqueous, n-octanol and cyclohexanone phases at the B3LYP/6-31G\*/RECP Level of Theory.<sup>a</sup>

**Table S4** Differences in the Gibbs free energies ( $\Delta\Delta G$ , kcal/mol) between the PhenBHPPA complexes with of Am<sup>3+</sup> and Eu<sup>3+</sup> in gas, aqueous, n-octanol, and cyclohexanone phases at the B3LYP/6-31G\*/RECP Level.

**Fig. S1** Changes of Gibbs free energy ( $\Delta G$ , kcal/mol) for 25 complexing reactions from five different Eu(III) starting reactants to five different products in the gas phase.

**Complete Gaussian 09 reference (Reference 37)**

**Table S1** The average  $\rho$  and  $\nabla^2\rho$  values of the M-N<sub>L</sub> and M-O<sub>L</sub> BCPs in the Eu and Am complexes with PhenBHPPA.

| Species                | [ML] <sup>3+</sup> | [ML(NO <sub>3</sub> ) <sub>2</sub> ] <sup>2+</sup> | [ML(H <sub>2</sub> O) <sub>3</sub> ] <sup>3+</sup> | [ML(NO <sub>3</sub> )(H <sub>2</sub> O) <sub>2</sub> ] <sup>2+</sup> | [ML(NO <sub>3</sub> ) <sub>2</sub> ] <sup>+</sup> | ML(NO <sub>3</sub> ) <sub>3</sub> |
|------------------------|--------------------|----------------------------------------------------|----------------------------------------------------|----------------------------------------------------------------------|---------------------------------------------------|-----------------------------------|
| $\rho_{M-N_L}$         | 0.047/0.051        | 0.039/0.043                                        | 0.027/0.033                                        | 0.030/0.035                                                          | 0.027/0.031                                       | 0.026/0.029                       |
| $\nabla^2\rho_{M-N_L}$ | 0.158/0.167        | 0.134/0.143                                        | 0.090/0.097                                        | 0.101/0.116                                                          | 0.084/0.098                                       | 0.089/0.098                       |
| $\rho_{M-O_L}$         | 0.069/0.073        | 0.052/0.054                                        | 0.036/0.045                                        | 0.044/0.047                                                          | 0.036/0.039                                       | 0.034/0.036                       |
| $\nabla^2\rho_{M-O_L}$ | 0.299/0.315        | 0.223/0.229                                        | 0.142/0.179                                        | 0.185/0.196                                                          | 0.151/0.155                                       | 0.137/0.142                       |

<sup>a</sup>.../... represent the results of Eu and Am complexes, respectively.

**Table S2** Contribution (%) of metal atom and the nitrogen (N<sub>L</sub>) and oxygen atoms of ligand (O<sub>L</sub>), and the oxygen atoms of nitrate anion (O<sub>N</sub>) to the delocalized canonical MOs for complexes [EuL(NO<sub>3</sub>)<sub>2</sub>]<sup>+</sup> and [AmL(NO<sub>3</sub>)<sub>2</sub>]<sup>+</sup>.

|                                           | 261                  | 254                  | 253                  | 243       | 240      | 225      |
|-------------------------------------------|----------------------|----------------------|----------------------|-----------|----------|----------|
| Eu                                        | 4f: 78.69            | 4f: 10.74            | 4f:31.55             | 4f:1.45   | 4f:1.01  | 5d:1.32  |
| N <sub>L</sub>                            | -                    | -                    | -                    | 2p:33.67  | 2p:15.35 | 2p:28.59 |
| O <sub>(NO<sub>3</sub><sup>-</sup>)</sub> | 2p:9.22              | 2p:21.27             | 2p:31.02             | 2p:26.73  | 2p:38.41 | 2p:11.74 |
| O <sub>L</sub>                            | 2p:1.05              | 2p:10.00             | -                    | -         | 2p:9.22  | -        |
|                                           | 279                  | 272                  | 271                  | 249       | 244      | 240      |
| Am                                        | 5f: 72.01<br>6d:1.45 | 5f: 15.93<br>6d:1.15 | 5f: 17.43<br>6d:1.06 | 5f:3.12   | 5f:6.71  | 6d:2.80  |
| N <sub>L</sub>                            | -                    | -                    | -                    | 2p:26.74  | 2p:37.52 | 2p:29.26 |
| O <sub>(NO<sub>3</sub><sup>-</sup>)</sub> | 2p:12.57             | 2p: 52.68            | 2p:40.57             | 2p: 15.63 | 2p:12.74 | 2p:3.94  |
| O <sub>L</sub>                            | -                    | 2p:1.10              | -                    | -         | 2p:1.08  | -        |

**Table S3** Changes of Gibbs free energies (kcal/mol) for complexation reactions of Am<sup>3+</sup> and Eu<sup>3+</sup> complexes with PhenBHPPA ligand in the gas phase, aqueous, n-octanol and cyclohexanone phases at the B3LYP/6-31G\*/RECP Level of Theory.<sup>a</sup>

| Reactions                                                                                                                                                            | $\Delta G_{\text{gas}}$ | $\Delta G_{\text{aq}}$ | $\Delta G_{\text{n-oct}}$ | $\Delta G_{\text{cyc}}$ |
|----------------------------------------------------------------------------------------------------------------------------------------------------------------------|-------------------------|------------------------|---------------------------|-------------------------|
| $[\text{M}(\text{NO}_3)(\text{H}_2\text{O})_6]^{2+} + \text{L} \rightarrow [\text{ML}(\text{NO}_3)]^{2+} + 6\text{H}_2\text{O}$                                      | <b>-66.39/-71.48</b>    | <b>-13.32/-18.52</b>   | <b>-4.20/-8.40</b>        | <b>-11.58/-16.04</b>    |
| $[\text{M}(\text{NO}_3)(\text{H}_2\text{O})_6]^{2+} + \text{L} \rightarrow [\text{ML}(\text{H}_2\text{O})_3]^{3+} + 3\text{H}_2\text{O} + \text{NO}_3^-$             | <b>133.55/128.07</b>    | <b>4.43/-2.44</b>      | <b>26.82/20.05</b>        | <b>14.33/-7.31</b>      |
| $[\text{M}(\text{NO}_3)(\text{H}_2\text{O})_6]^{2+} + \text{L} \rightarrow [\text{ML}(\text{NO}_3)(\text{H}_2\text{O})_2]^{2+} + 4\text{H}_2\text{O}$                | <b>-74.79/-79.32</b>    | <b>-14.21/-19.89</b>   | <b>-3.91/-8.07</b>        | <b>-12.47/-17.29</b>    |
| $[\text{M}(\text{NO}_3)(\text{H}_2\text{O})_6]^{2+} + \text{L} + \text{NO}_3^- \rightarrow [\text{ML}(\text{NO}_3)_2]^+ + 6\text{H}_2\text{O}$                       | <b>-210.74/-217.17</b>  | <b>-21.47/-28.33</b>   | <b>-18.39/-24.09</b>      | <b>-23.68/-29.83</b>    |
| $[\text{M}(\text{NO}_3)(\text{H}_2\text{O})_6]^{2+} + 2\text{NO}_3^- + \text{L} \rightarrow \text{ML}(\text{NO}_3)_3 + 6\text{H}_2\text{O}$                          | <b>-277.62/-286.85</b>  | <b>-17.25/-27.13</b>   | <b>-14.12/-14.42</b>      | <b>-18.80/-21.48</b>    |
| $[\text{M}(\text{NO}_3)_2(\text{H}_2\text{O})_3]^+ + \text{L} \rightarrow [\text{ML}(\text{NO}_3)]^{2+} + \text{NO}_3^- + 3\text{H}_2\text{O}$                       | 106.23/105.25           | -4.38/-5.21            | 4.73/4.92                 | -2.65/-2.72             |
| $[\text{M}(\text{NO}_3)_2(\text{H}_2\text{O})_3]^+ + \text{L} \rightarrow [\text{ML}(\text{H}_2\text{O})_3]^{3+} + 2\text{NO}_3^-$                                   | 306.17/304.81           | 13.37/10.88            | 35.76/33.37               | 23.26/20.63             |
| $[\text{M}(\text{NO}_3)_2(\text{H}_2\text{O})_3]^+ + \text{L} \rightarrow [\text{ML}(\text{NO}_3)(\text{H}_2\text{O})_2]^{2+} + \text{H}_2\text{O} + \text{NO}_3^-$  | 97.83/56.00             | -5.28/-6.57            | 5.03/5.25                 | -3.54/-3.97             |
| $[\text{M}(\text{NO}_3)_2(\text{H}_2\text{O})_3]^+ + \text{L} \rightarrow [\text{ML}(\text{NO}_3)_2]^+ + 3\text{H}_2\text{O}$                                        | -38.12/-40.43           | -12.53/-15.01          | -9.45/-10.77              | -14.75/-16.51           |
| $[\text{M}(\text{NO}_3)_2(\text{H}_2\text{O})_3]^+ + \text{NO}_3^- + \text{L} \rightarrow \text{ML}(\text{NO}_3)_3 + 3\text{H}_2\text{O}$                            | -105.00/-110.11         | -8.31/-13.81           | -5.19/-1.11               | -9.86/-8.17             |
| $\text{M}(\text{NO}_3)_3(\text{H}_2\text{O})_4 + \text{L} \rightarrow [\text{ML}(\text{NO}_3)]^{2+} + 2\text{NO}_3^- + 4\text{H}_2\text{O}$                          | 234.86/225.18           | 7.25/-0.73             | 16.37/17.60               | 8.99/9.96               |
| $\text{M}(\text{NO}_3)_3(\text{H}_2\text{O})_4 + \text{L} \rightarrow [\text{ML}(\text{H}_2\text{O})_3]^{3+} + \text{H}_2\text{O} + 3\text{NO}_3^-$                  | 434.80/435.83           | 25.00/23.55            | 47.39/46.04               | 34.90/33.31             |
| $\text{M}(\text{NO}_3)_3(\text{H}_2\text{O})_4 + \text{L} \rightarrow [\text{ML}(\text{NO}_3)(\text{H}_2\text{O})_2]^{2+} + 2\text{H}_2\text{O} + 2\text{NO}_3^-$    | 226.46/228.44           | 6.35/6.11              | 16.66/17.92               | 8.09/8.71               |
| $\text{M}(\text{NO}_3)_3(\text{H}_2\text{O})_4 + \text{L} \rightarrow [\text{ML}(\text{NO}_3)_2]^+ + \text{NO}_3^- + 4\text{H}_2\text{O}$                            | 90.52/90.59             | -0.90/-2.33            | 2.18/1.91                 | -3.11/-3.83             |
| $\text{M}(\text{NO}_3)_3(\text{H}_2\text{O})_4 + \text{L} \rightarrow \text{ML}(\text{NO}_3)_3 + 4\text{H}_2\text{O}$                                                | 23.63/20.91             | 3.32/-1.14             | 6.44/11.57                | 1.77/4.51               |
| $[\text{M}(\text{NO}_3)_2(\text{H}_2\text{O})_4]^+ + \text{L} \rightarrow [\text{ML}(\text{NO}_3)]^{2+} + \text{NO}_3^- + 4\text{H}_2\text{O}$                       | 121.09/120.21           | 2.26/2.04              | 11.37/12.71               | 4.00/4.53               |
| $[\text{M}(\text{NO}_3)_2(\text{H}_2\text{O})_4]^+ + \text{L} \rightarrow [\text{ML}(\text{H}_2\text{O})_3]^{3+} + 2\text{NO}_3^- + \text{H}_2\text{O}$              | 321.02/319.77           | 20.01/18.12            | 42.40/40.61               | 29.90/27.87             |
| $[\text{M}(\text{NO}_3)_2(\text{H}_2\text{O})_4]^+ + \text{L} \rightarrow [\text{ML}(\text{NO}_3)(\text{H}_2\text{O})_2]^{2+} + 2\text{H}_2\text{O} + \text{NO}_3^-$ | 112.68/112.37           | 1.36/0.68              | 11.67/12.49               | 3.10/3.28               |

|                                                                                                                                                                  |                 |               |               |               |
|------------------------------------------------------------------------------------------------------------------------------------------------------------------|-----------------|---------------|---------------|---------------|
| $[\text{M}(\text{NO}_3)_2(\text{H}_2\text{O})_4]^+ + \text{L} \rightarrow [\text{ML}(\text{NO}_3)_2]^+ + 4\text{H}_2\text{O}$                                    | -23.26/-25.48   | -5.89/-7.77   | -2.81/-3.53   | -8.11/-9.27   |
| $[\text{M}(\text{NO}_3)_2(\text{H}_2\text{O})_4]^+ + \text{NO}_3^- + \text{L} \rightarrow \text{ML}(\text{NO}_3)_3 + 4\text{H}_2\text{O}$                        | -90.15/-95.16   | -1.67/-6.57   | -1.45/6.14    | -3.22/-0.92   |
| $\text{M}(\text{NO}_3)_3(\text{H}_2\text{O})_3 + \text{L} \rightarrow [\text{ML}(\text{NO}_3)]^{2+} + 2\text{NO}_3^- + 3\text{H}_2\text{O}$                      | 232.16/232.81   | 8.16/9.30     | 17.28/19.43   | 9.90/11.79    |
| $\text{M}(\text{NO}_3)_3(\text{H}_2\text{O})_3 + \text{L} \rightarrow [\text{ML}(\text{H}_2\text{O})_3]^{3+} + 3\text{NO}_3^-$                                   | 432.10/432.37   | 25.91/25.38   | 48.30/17.33   | 35.81/35.14   |
| $\text{M}(\text{NO}_3)_3(\text{H}_2\text{O})_3 + \text{L} \rightarrow [\text{ML}(\text{NO}_3)(\text{H}_2\text{O})_2]^{2+} + \text{H}_2\text{O} + 2\text{NO}_3^-$ | 223.76/224.98   | 7.26/7.94     | 17.57/19.75   | 9.00/10.54    |
| $\text{M}(\text{NO}_3)_3(\text{H}_2\text{O})_3 + \text{L} \rightarrow [\text{ML}(\text{NO}_3)_2]^+ + \text{NO}_3^- + 3\text{H}_2\text{O}$                        | 87.81/87.13     | 0.01/-0.51    | 3.09/3.73     | -2.20/-2.00   |
| $\text{M}(\text{NO}_3)_3(\text{H}_2\text{O})_3 + \text{L} \rightarrow \text{ML}(\text{NO}_3)_3 + 3\text{H}_2\text{O}$                                            | 20.93/17.45     | 4.23/0.69     | 7.35/13.40    | 2.68/6.34     |
| $[\text{M}(\text{H}_2\text{O})_9]^{3+} + \text{NO}_3^- + \text{L} \rightarrow [\text{ML}(\text{NO}_3)]^{2+} + 9\text{H}_2\text{O}$                               | -314.36/-308.93 | -32.05/-28.86 | -22.94/-18.73 | -30.31/-26.37 |
| $[\text{M}(\text{H}_2\text{O})_9]^{3+} + \text{L} \rightarrow [\text{ML}(\text{H}_2\text{O})_3]^{3+} + 6\text{H}_2\text{O}$                                      | -114.42/-109.37 | -14.30/-12.78 | 8.09/9.71     | -4.41/-3.03   |
| $[\text{M}(\text{H}_2\text{O})_9]^{3+} + \text{L} + \text{NO}_3^- \rightarrow [\text{ML}(\text{NO}_3)(\text{H}_2\text{O})_2]^{2+} + 7\text{H}_2\text{O}$         | -322.76/-316.76 | -32.95/-30.22 | -22.64/-18.41 | -31.21/-27.62 |
| $[\text{M}(\text{H}_2\text{O})_9]^{3+} + \text{L} + 2\text{NO}_3^- \rightarrow [\text{ML}(\text{NO}_3)_2]^+ + 9\text{H}_2\text{O}$                               | -458.71/-454.61 | -40.20/-38.67 | -37.12/-34.43 | -42.42/-40.17 |
| $[\text{M}(\text{H}_2\text{O})_9]^{3+} + \text{L} + 3\text{NO}_3^- \rightarrow \text{ML}(\text{NO}_3)_3 + 9\text{H}_2\text{O}$                                   | -525.59/-524.29 | -35.98/-37.47 | -32.86/-24.76 | -61.72/-31.82 |

<sup>a</sup>.../... denotes Gibbs free energies for Eu and Am complexes.

**Table S4** Differences in the Gibbs free energies (kcal/mol) of formation and extraction of the PhenBHPPA complexes with of  $\text{Am}^{3+}$  and  $\text{Eu}^{3+}$  in gas, aqueous, n-octanol, and cyclohexanone phases at the B3LYP/6-31G\*/RECP Level.

| Reactions                                                                                                                                                           | $\Delta\Delta G_{\text{gas}}$ | $\Delta\Delta G_{\text{aq}}$ | $\Delta\Delta G_{\text{n-oct}}$ | $\Delta\Delta G_{\text{cyc}}$ |
|---------------------------------------------------------------------------------------------------------------------------------------------------------------------|-------------------------------|------------------------------|---------------------------------|-------------------------------|
| $[\text{M}(\text{NO}_3)_2(\text{H}_2\text{O})_3]^+ + \text{L} \rightarrow [\text{ML}(\text{NO}_3)]^{2+} + \text{NO}_3^- + 3\text{H}_2\text{O}$                      | -0.98                         | -0.83                        | 0.19                            | -0.07                         |
| $[\text{M}(\text{NO}_3)_2(\text{H}_2\text{O})_3]^+ + \text{L} \rightarrow [\text{ML}(\text{H}_2\text{O})_3]^{3+} + 2\text{NO}_3^-$                                  | -1.36                         | -2.49                        | -2.39                           | -2.39                         |
| $[\text{M}(\text{NO}_3)_2(\text{H}_2\text{O})_3]^+ + \text{L} \rightarrow [\text{ML}(\text{NO}_3)(\text{H}_2\text{O})_2]^{2+} + \text{H}_2\text{O} + \text{NO}_3^-$ | -4.183                        | -1.29                        | 0.22                            | -0.43                         |
| $[\text{M}(\text{NO}_3)_2(\text{H}_2\text{O})_3]^+ + \text{L} \rightarrow [\text{ML}(\text{NO}_3)_2]^+ + 3\text{H}_2\text{O}$                                       | -2.31                         | -2.48                        | -1.32                           | -1.76                         |
| $[\text{M}(\text{NO}_3)_2(\text{H}_2\text{O})_3]^+ + \text{NO}_3^- + \text{L} \rightarrow \text{ML}(\text{NO}_3)_3 + 3\text{H}_2\text{O}$                           | -5.11                         | -5.50                        | 4.08                            | 1.69                          |
| $[\text{M}(\text{NO}_3)_2(\text{H}_2\text{O})_4]^+ + \text{L} \rightarrow [\text{ML}(\text{NO}_3)]^{2+} + \text{NO}_3^- + 4\text{H}_2\text{O}$                      | -0.88                         | -0.22                        | 1.34                            | 0.53                          |

|                                                                                  |       |       |        |       |
|----------------------------------------------------------------------------------|-------|-------|--------|-------|
| $[M(NO_3)_2(H_2O)_4]^+ + L \rightarrow [ML(H_2O)_3]^{3+} + 2NO_3^- + H_2O$       | -1.25 | -1.89 | -1.79  | -2.03 |
| $[M(NO_3)_2(H_2O)_4]^+ + L \rightarrow [ML(NO_3)(H_2O)_2]^{2+} + 2H_2O + NO_3^-$ | -0.31 | -0.68 | 0.82   | 0.18  |
| $[M(NO_3)_2(H_2O)_4]^+ + L \rightarrow [ML(NO_3)_2]^+ + 4H_2O$                   | -2.22 | -1.88 | -0.72  | -1.16 |
| $[M(NO_3)_2(H_2O)_4]^+ + NO_3^- + L \rightarrow ML(NO_3)_3 + 4H_2O$              | -5.01 | -4.90 | 7.59   | 2.30  |
| $M(NO_3)_3(H_2O)_3 + L \rightarrow [ML(NO_3)]^{2+} + 2NO_3^- + 3H_2O$            | 0.65  | 1.14  | 2.15   | 1.89  |
| $M(NO_3)_3(H_2O)_3 + L \rightarrow [ML(H_2O)_3]^{3+} + 3NO_3^-$                  | 0.27  | -0.53 | -30.97 | -0.67 |
| $M(NO_3)_3(H_2O)_3 + L \rightarrow [ML(NO_3)(H_2O)_2]^{2+} + H_2O + 2NO_3^-$     | 1.22  | 0.68  | 2.18   | 1.54  |
| $M(NO_3)_3(H_2O)_3 + L \rightarrow [ML(NO_3)_2]^+ + NO_3^- + 3H_2O$              | -0.68 | -0.52 | 0.64   | -0.20 |
| $M(NO_3)_3(H_2O)_3 + L \rightarrow ML(NO_3)_3 + 3H_2O$                           | -3.48 | -3.54 | 6.05   | 3.66  |
| $[M(H_2O)_9]^{3+} + NO_3^- + L \rightarrow [ML(NO_3)]^{2+} + 9H_2O$              | 5.43  | 3.19  | 4.21   | 3.94  |
| $[M(H_2O)_9]^{3+} + L \rightarrow [ML(H_2O)_3]^{3+} + 6H_2O$                     | 5.05  | 1.52  | 1.62   | 1.38  |
| $[M(H_2O)_9]^{3+} + L + NO_3^- \rightarrow [ML(NO_3)(H_2O)_2]^{2+} + 7H_2O$      | 6.00  | 2.73  | 4.23   | 3.59  |
| $[M(H_2O)_9]^{3+} + L + 2NO_3^- \rightarrow [ML(NO_3)_2]^+ + 9H_2O$              | 4.10  | 1.53  | 2.69   | 2.25  |
| $[M(H_2O)_9]^{3+} + L + 3NO_3^- \rightarrow ML(NO_3)_3 + 9H_2O$                  | 1.30  | 1.49  | 8.10   | 29.9  |

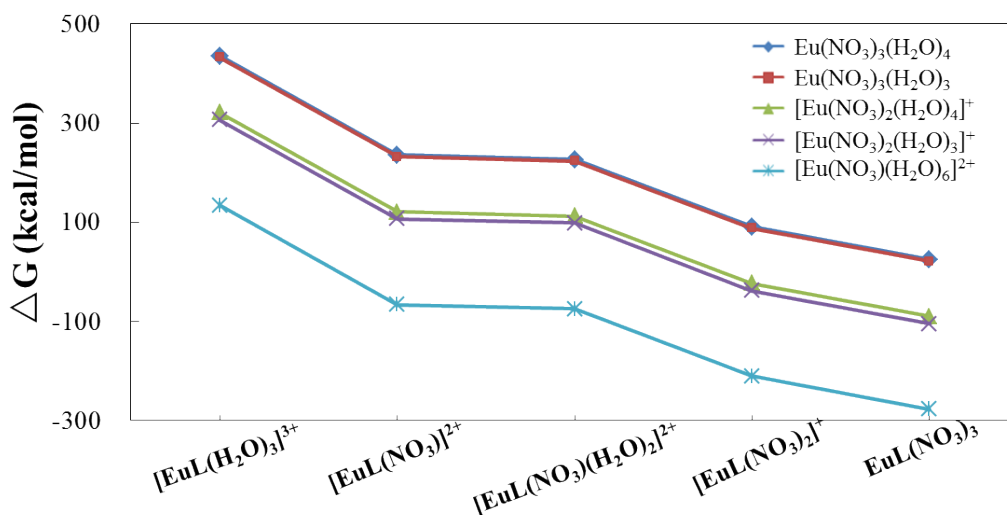

**Fig. S1** Changes of Gibbs free energy ( $\Delta G$ , kcal/mol) for 25 complexing reactions from five different Eu(III) starting reactants to five different products in the gas phase.

## Complete Gaussian 09 reference (Reference 37)

Frisch, M. J.; Trucks, G. W.; Schlegel, H. B.; Scuseria, G. E.; Robb, M. A.; Cheeseman, J. R.; Scalmani, G.; Barone, V.; Mennucci, B.; Petersson, G. A.; Nakatsuji, H.; Caricato, M.; Li, X.; Hratchian, H. P.; Izmaylov, A. F.; Bloino, J.; Zheng, G.; Sonnenberg, J. L.; Hada, M.; Ehara, M.; Toyota, K.; Fukuda, R.; Hasegawa, J.; Ishida, M.; Nakajima, T.; Honda, Y.; Kitao, O.; Nakai, H.; Vreven, T.; Montgomery, J. A., Jr.; Peralta, J. E.; Ogliaro, F.; Bearpark, M.; Heyd, J. J.; Brothers, E.; Kudin, K. N.; Staroverov, V. N.; Kobayashi, R.; Normand, J.; Raghavachari, K.; Rendell, A.; Burant, J. C.; Iyengar, S. S.; Tomasi, J.; Cossi, M.; Rega, N.; Millam, J. M.; Klene, M.; Knox, J. E.; Cross, J. B.; Bakken, V.; Adamo, C.; Jaramillo, J.; Gomperts, R. E.; Stratmann, O.; Yazyev, A. J.; Austin, R.; Cammi, C.; Pomelli, J. W.; Ochterski, R.; Martin, R. L.; Morokuma, K.; Zakrzewski, V. G.; Voth, G. A.; Salvador, P.; Dannenberg, J. J.; Dapprich, S.; Daniels, A. D.; Farkas, O.; Foresman, J. B.; Ortiz, J. V.; Cioslowski, J.; Fox, D. J. *Gaussian 09*, revision A.02; Gaussian, Inc.: Wallingford, CT, 2009.
